# Supplementary material for: A docked mutation phenocopies dumpy oblique alleles via altered vesicle trafficking
Source: PeerJ. 2021 Oct 13;9:e12175. doi: 10.7717/peerj.12175 (PMC8520396; doi:10.7717/peerj.12175)
Supplement: Supplemental Information 5 — Individual wing length measurements for siblings from three crosses. Each cross compares heterozygous dpy females (carrying one of three dominant dpy alleles) with their siblings also heterozygous for the doc1 allele. [file peerj-09-12175-s005.xlsx]

## Sheet: Wing data
dpyDvlG5/+; doc1/+			dpyDvlG5/+;+/TM3			dpyD/+;doc1/+			dpyD/+;+/TM3,Sb			dpyolvr/+;+/doc1			dpyolvr/+;+/TM3,Sb
wing #	wing length(um)		wing #	wing length(um)		wing #	length(um)		wing #	length(um)		wing #	length(um)		wing #	length(um)
1	1049		1	1191		1	849		1	1276		1	1095.51		1	1378.11
2	992		2	1128		2	880		2	1226		2	1111.82		2	1274.19
3	999		3	1106		3	878		3	1292		3	1156.82		3	1380.97
4	903		4	1135		4	904		4	1232		4	1177.77		4	1307.43
5	787		5	1169		5	856		5	1214		5	1086.24		5	1414.34
6	861		6	1229		6	937		6	1197		6	1134.72		6	1271.02
7	865		7	1023		7	865		7	1281		7	1050.26		7	1387.38
8	875		8	1151		8	808		8	1228		8	1123.28		8	1570.43
9	898		9	1177		9	906		9	1237		9	1145.35		9	1463.56
10	1007		10	1098		10	924		10	1223		10	1089.15		10	1520.07
11	967		11	1123		11	874		11	1410		11	1194.74		11	1510.97
12	986		12	1100		12	855		12	1352		12	1195.34		12	1600.71
13	979		13	1093		13	864		13	1395		13	1094.9		13	1573.22
14	943		14	1067		14	869		14	1391		14	1142.73		14	1617.39
15	979		15	1273		15	927		15	1366		15	1159.26		15	1529.86
16	927		16	1190		16	931		16	1330		16	1157.86		16	1505.88
17	786		17	1193		17	849		17	1263		17	1078.17			1456.6
18	868		18	1170		18	835		18	1227		18	1103.29
19	810		19	1176		19	895		19	1314		19	1040.11
20	911		20	1183		20	888		20	1287		20	1080.45
21	878		21	1111		21	864		21	1283		21	1280.55
22	874		22	1154		22	997		22	1298		22	1039.03
23	944		23	1156		23	1008		23	1349			1124.42
24	848		24	1247		24	1007		24	1338
25	826		25	1129		25	1049		25	1313
26	920		26	1213		26	931		26	1239
27	919		27	1170		27	917		27	1289
28	967		28	1176		28	924		28	1316
29	967		30	1340		29	1084		29	1318
30	1049		31	1385		30	937		30	1329
31	912		32	1318		31	883		31	1326
32	941		33	1283		32	919		32	1210
33	980		34	1314		33	927		33	1333
35	891		35	1206		34	930			1293.39
36	972		36	1203		35	920
37	960		37	1349		36	937
38	900		38	1236		37	941
39	880		39	1243			912.676
40	963		40	1261
41	951		41	1244
42	910		42	1210
43	938		43	1216
44	849		44	1271
45	915		45	1299
46	941		46	1223
47	877		47	1259
48	1001		48	1277
49	934		49	1250
	922.896			1202.46

## Sheet: Stats DvlG5-doc1
dpyDVLG5
1	1049
2	992
3	999
4	903		t-Test: Two-Sample Assuming Unequal Variances
5	787			dpyDvlG5-doc1	dpyDvlG5-+
6	861		Mean	922.896	1202.46
7	865		Variance	3772.44	6042.51
8	875		Observations	48	48
9	898		Hypothesized Mean Difference	0
10	1007		df	89
11	967		t Stat	-19.5504
12	986		P(T<=t) one-tail	2.87624e-34
13	979		t Critical one-tail	1.66216
14	943		P(T<=t) two-tail	5.75248e-34
15	979		t Critical two-tail	1.98698
16	927
17	786
18	868
19	810
20	911
21	878
22	874
23	944
24	848
25	826
26	920
27	919
28	967
29	967
30	1049
31	912
32	941
33	980
35	891
36	972
37	960
38	900
39	880
40	963
41	951
42	910
43	938
44	849
45	915
46	941
47	877
48	1001
49	934
1	1191
2	1128
3	1106
4	1135
5	1169
6	1229
7	1023
8	1151
9	1177
10	1098
11	1123
12	1100
13	1093
14	1067
15	1273
16	1190
17	1193
18	1170
19	1176
20	1183
21	1111
22	1154
23	1156
24	1247
25	1129
26	1213
27	1170
28	1176
30	1340
31	1385
32	1318
33	1283
34	1314
35	1206
36	1203
37	1349
38	1236
39	1243
40	1261
41	1244
42	1210
43	1216
44	1271
45	1299
46	1223
47	1259
48	1277
49	1250

## Sheet: Stats D-doc1
dpyD
1	849		t-Test: Two-Sample Assuming Unequal Variances
2	880
3	878			dpyD;doc1/+	dpyD;+/TM3
4	904		Mean	912.676	1293.39
5	856		Variance	3433.45	3331.62
6	937		Observations	37	33
7	865		Hypothesized Mean Difference	0
8	808		df	67
9	906		t Stat	-27.3513
10	924		P(T<=t) one-tail	2.25088e-38
11	874		t Critical one-tail	1.66792
12	855		P(T<=t) two-tail	4.50177e-38
13	864		t Critical two-tail	1.99601
14	869
15	927
16	931
17	849
18	835
19	895
20	888
21	864
22	997
23	1008
24	1007
25	1049
26	931
27	917
28	924
29	1084
30	937
31	883
32	919
33	927
34	930
35	920
36	937
37	941
1	1276
2	1226
3	1292
4	1232
5	1214
6	1197
7	1281
8	1228
9	1237
10	1223
11	1410
12	1352
13	1395
14	1391
15	1366
16	1330
17	1263
18	1227
19	1314
20	1287
21	1283
22	1298
23	1349
24	1338
25	1313
26	1239
27	1289
28	1316
29	1318
30	1329
31	1326
32	1210
33	1333

## Sheet: Stats olvr-doc1
dpy-olvr
1	1095.51		t-Test: Two-Sample Assuming Unequal Variances
2	1111.82
3	1156.82			dpy^olvr; doc1	dpy^olvr; +
4	1177.77		Mean	1124.42	1456.6
5	1086.24		Variance	3354.56	13095.3
6	1134.72		Observations	22	16
7	1050.26		Hypothesized Mean Difference	0
8	1123.28		df	21
9	1145.35		t Stat	-10.6602
10	1089.15		P(T<=t) one-tail	3.12612e-10
11	1194.74		t Critical one-tail	1.72074
12	1195.34		P(T<=t) two-tail	6.25223e-10
13	1094.9		t Critical two-tail	2.07961
14	1142.73
15	1159.26
16	1157.86
17	1078.17
18	1103.29
19	1040.11
20	1080.45
21	1280.55
22	1039.03
1	1378.11
2	1274.19
3	1380.97
4	1307.43
5	1414.34
6	1271.02
7	1387.38
8	1570.43
9	1463.56
10	1520.07
11	1510.97
12	1600.71
13	1573.22
14	1617.39
15	1529.86
16	1505.88
